# Supplementary material for: A century of ice retreat on Kilimanjaro: the mapping reloaded
Source: Copernicus journal article supplement (doi:10.5194/tc-7-419-2013), 2013-03-04
Supplement: Supplementary file 1 [file tc-7-419-2013-supplement.pdf]

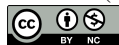

## A century of ice retreat on Kilimanjaro: the mapping reloaded (Supplementary material)

N. J. Cullen<sup>1</sup>, P. Sirguey<sup>2</sup>, T. Mölg<sup>3</sup>, G. Kaser<sup>4</sup>, M. Winkler<sup>4</sup>, and S. J. Fitzsimons<sup>1</sup>

<sup>1</sup>Department of Geography, University of Otago, Dunedin, New Zealand

<sup>2</sup>School of Surveying, University of Otago, Dunedin, New Zealand

<sup>3</sup>Chair of Climatology, Technische Universität Berlin, Germany

<sup>4</sup>Centre of Climate and Cryosphere, Institute of Meteorology and Geophysics, University of Innsbruck, Austria

This supplementary material provides two additional figures illustrating the sequence of glacier retreat on Kilimanjaro. Note that these animations may take some time to load in adobe acrobat.

1. Figure S1 on page 2 is an interactive 3D model illustrating the glaciers on Kilimanjaro. The model can be panned, rotated, and zoomed via mouse operations.
2. Figure S2 on page 3 is an animated video sequence featuring a fly-over around a 3D model of Kilimanjaro made with Kompsat imagery draped over the SRTM DEM. This sequence graphically depicts the retreat of Kilimanjaro glaciers as a sequence spanning eight epochs from 1912 to 2011.

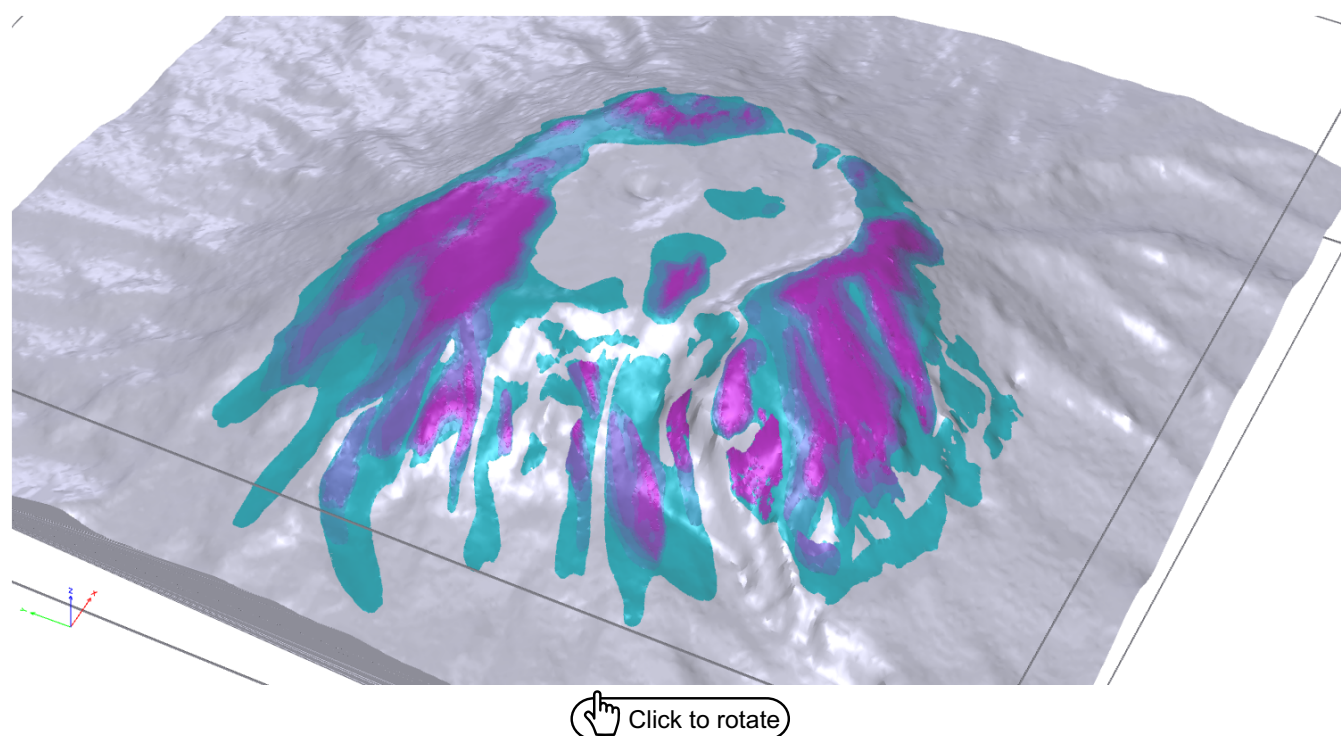

**Fig. S1.** Interactive figure illustrating the glaciers on Kilimanjaro draped over the SRTM DEM. The model can be panned/rotated/zoomed via mouse operations. A navigation toolbar can be accessed by placing the mouse over the model. The layers corresponding to the sequence of glacier outlines from 1912 to 2011 can be switched on and off in the model tree when the latter is toggled on in the toolbar.

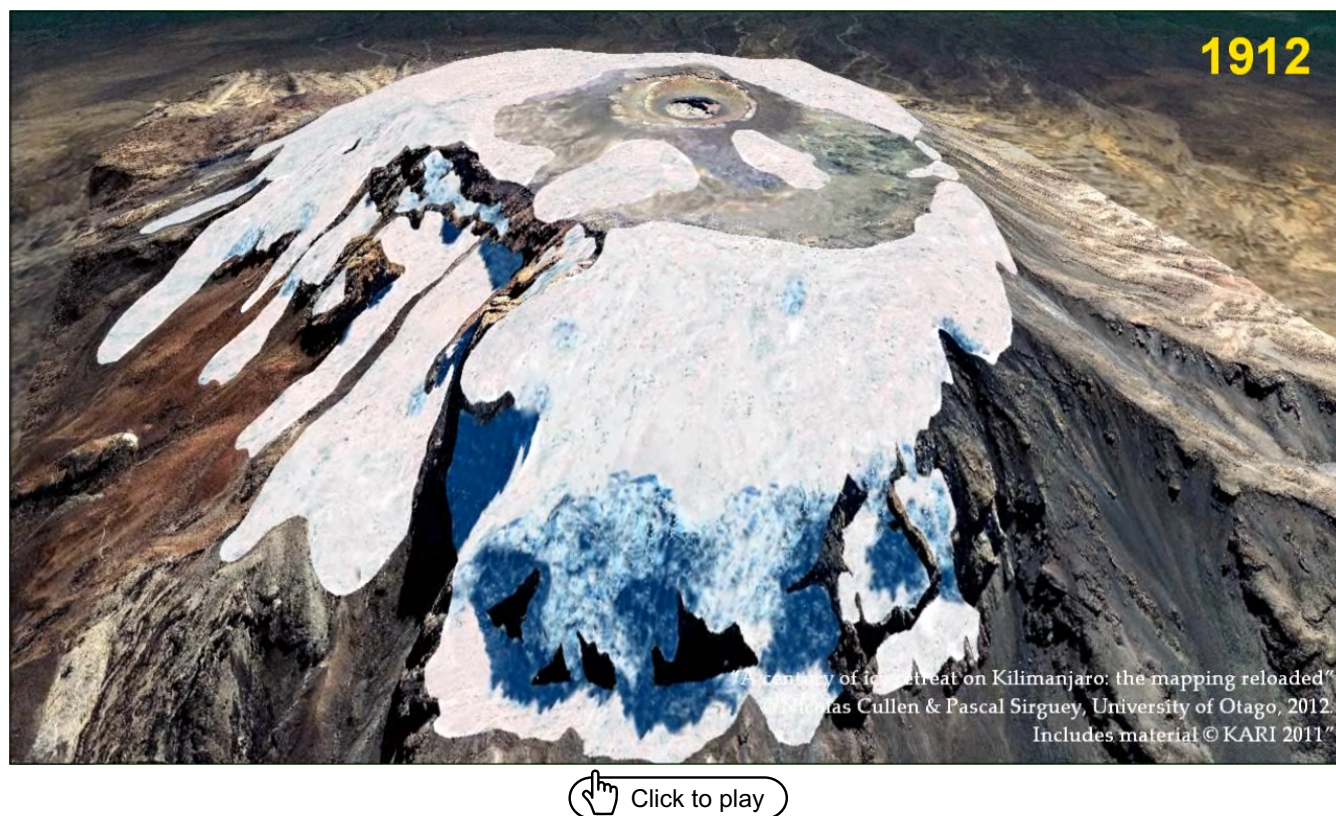

**Fig. S2.** Animated video sequence featuring a fly-over around a 3D model of Kilimanjaro made with Kompsat imagery draped over the SRTM DEM. This sequence graphically depicts the retreat of Kilimanjaro glaciers as a sequence spanning eight epochs from 1912 to 2011. Note that the pdf file may require to be trusted for this animation to play in Acrobat Reader. Alternatively, the embedded animation .AVI file can be saved to disk by right-clicking next to the figure frame.
